# Supplementary material
Source: publisher site journal article supplement (https://www.dovepress.com/get_supplementary_file.php?f=458722.docx)
Supplement: Supplementary file 1 [file get_supplementary_file.php]

**Supplementary Material**

**Table S1.** Distribution of screened persons detected with active TB, by county (% of total screened persons)

| County Screening | No. TB cases | % |
| --- | --- | --- |
| Alba | 1 | 0.5% |
| Arad | 3 | 1.4% |
| Argeș | 2 | 0.9% |
| B-IF | 28 | 12.8% |
| Bacău | 4 | 1.8% |
| Bihor | 4 | 1.8% |
| Bistrița | 4 | 1.8% |
| Botoșani | 14 | 6.4% |
| Brăila | 6 | 2.8% |
| Brașov | 2 | 0.9% |
| Buzău | 10 | 4.6% |
| Caraș-Severin | 7 | 3.2% |
| Cluj | 2 | 0.9% |
| Constanța | 11 | 5.0% |
| Dâmbovița | 2 | 0.9% |
| Dolj | 4 | 1.8% |
| Galați | 5 | 2.3% |
| Giurgiu | 6 | 2.8% |
| Gorj | 5 | 2.3% |
| Ialomița | 4 | 1.8% |
| Iași | 12 | 5.5% |
| Maramureș | 4 | 1.8% |
| Mehedinți | 3 | 1.4% |
| Neamț | 17 | 7.8% |
| Olt | 4 | 1.8% |
| PDL | 3 | 1.4% |
| Prahova | 2 | 0.9% |
| Sălaj | 2 | 0.9% |
| Suceava | 7 | 3.2% |
| Teleorman | 6 | 2.8% |
| Tulcea | 17 | 7.8% |
| Vâlcea | 3 | 1.4% |
| Vaslui | 13 | 6.0% |
| Vrancea | 1 | 0.5% |
| Grand Total | 218 | 100.0% |

**Table S2.** Socio-demographic profile of cases with active TB

|  | | **Vulnerable groups (n=218)** | | | | | | | | | |
| --- | --- | --- | --- | --- | --- | --- | --- | --- | --- | --- | --- |
| **PWID (6)** | | **HP (14)** | | **PDL (3)** | | **RR (195)** | | **Total** | |
| **TB cases** | **%** | **TB cases** | **%** | **TB cases** | **%** | **TB cases** | **%** | **TB cases** | **%** |
| Gender | F | 1 | 16.7% | 3 | 21.4% |  |  | 52 | 26.7% | 56 | 25.7% |
| M | 5 | 83.3% | 11 | 78.6% | 3 | 100.0% | 143 | 73.3% | 162 | 74.3% |
| Total | 6 | 100.0% | 14 | 100.0% | 3 | 100.0% | 195 | 100.0% | 218 | 100.0% |
| Age (years) | 15-19 |  |  |  |  |  |  | 1 | 0.5% | 1 | 0.5% |
| 20-24 |  |  |  |  |  |  | 3 | 1.5% | 3 | 1.4% |
| 25-34 | 2 | 33.3% | 2 | 14.3% | 1 | 33.3% | 9 | 4.6% | 14 | 6.4% |
| 35-44 | 3 | 50.0% | 4 | 28.6% | 1 | 33.3% | 24 | 12.3% | 32 | 14.7% |
| 45-54 | 1 | 16.7% | 3 | 21.4% | 1 | 33.3% | 52 | 26.7% | 57 | 26.1% |
| 55-64 |  |  | 2 | 14.3% |  |  | 47 | 24.1% | 49 | 22.5% |
| 65-74 |  |  | 3 | 21.4% |  |  | 33 | 16.9% | 36 | 16.5% |
| 75-84 |  |  |  |  |  |  | 23 | 11.8% | 23 | 10.6% |
| ≥85 |  |  |  |  |  |  | 3 | 1.5% | 3 | 1.4% |
| Total | 6 | 100.0% | 14 | 100.0% | 3 | 100.0% | 195 | 100.0% | 218 | 100.0% |
| Marital status | No answer |  |  |  |  |  |  | 2 | 1.0% | 2 | 0.9% |
| Married/Concubinage | 4 | 66.7% | 1 | 7.1% | 1 | 33.3% | 99 | 50.8% | 105 | 48.2% |
| Single | 2 | 33.3% | 13 | 92.9% | 2 | 66.7% | 94 | 48.2% | 111 | 50.9% |
| Total | 6 | 100.0% | 14 | 100.0% | 3 | 100.0% | 195 | 100.0% | 218 | 100.0% |
| Insured status | No answer |  |  | 1 | 7.1% |  |  | 13 | 6.7% | 14 | 6.4% |
| Yes | 5 | 83.3% | 2 | 14.3% | 3 | 100.0% | 134 | 68.7% | 144 | 66.1% |
| No | 1 | 16.7% | 11 | 78.6% |  |  | 48 | 24.6% | 60 | 27.5% |
| Total | 6 | 100.0% | 14 | 100.0% | 3 | 100.0% | 195 | 100.0% | 218 | 100.0% |
| Number of persons living in the same dwelling | 0 |  |  | 3 | 50.0% |  |  | 11 | 6.3% | 14 | 7.4% |
| 1 | 2 | 33.3% | 2 | 33.3% |  |  | 52 | 29.7% | 56 | 29.5% |
| 2 | 1 | 16.7% |  |  |  |  | 51 | 29.1% | 52 | 27.4% |
| 3 |  |  |  |  |  |  | 18 | 10.3% | 18 | 9.5% |
| 4 | 1 | 16.7% |  |  |  |  | 18 | 10.3% | 19 | 10.0% |
| 5 | 2 | 33.3% | 1 | 16.7% | 1 | 33.3% | 16 | 9.1% | 20 | 10.5% |
| 6 |  |  |  |  |  |  | 5 | 2.9% | 5 | 2.6% |
| 7 |  |  |  |  |  |  | 1 | 0.6% | 1 | 0.5% |
| 9 |  |  |  |  |  |  | 3 | 1.7% | 3 | 1.6% |
| 11 |  |  |  |  | 1 | 33.3% |  |  | 1 | 0.5% |
| 40 |  |  |  |  | 1 | 33.3% |  |  | 1 | 0.5% |
| Total | 6 | 100.0% | 6 | 100.0% | 3 | 100.0% | 175 | 100.0% | 190 | 100.0% |
| Labor market status | Employee |  |  |  |  |  |  | 32 | 16.4% | 32 | 14.7% |
| Social assistance beneficiary |  |  |  |  |  |  | 14 | 7.2% | 14 | 6.4% |
| Inactive | 6 | 100.0% | 14 | 100.0% | 3 | 100.0% | 88 | 45.1% | 111 | 50.9% |
| Retired |  |  |  |  |  |  | 58 | 29.7% | 58 | 26.6% |
| Unemployed |  |  |  |  |  |  | 3 | 1.5% | 3 | 1.4% |
| Total | 6 | 100.0% | 14 | 100.0% | 3 | 100.0% | 195 | 100.0% | 218 | 100.0% |

**Table S3.** Distribution of active TB cases by symptom and sex (N=195, RR)

| Symptom | | Sex | | | | | |
| --- | --- | --- | --- | --- | --- | --- | --- |
| Female | | Male | | Total | |
| TB cases | % of TB cases | TB cases | % of TB cases | TB cases | % of TB cases |
| Cough | No answer | 0 | 0.0% | 1 | 0.7% | 1 | 0.5% |
| Yes | 24 | 46.2% | 90 | 62.9% | 114 | 58.5% |
| No | 28 | 53.8% | 52 | 36.4% | 80 | 41.0% |
| Total | 52 | 100.0% | 143 | 100.0% | 195 | 100.0% |
| Expectoration (sputum) | No answer | 0 | 0.0% | 1 | 0.7% | 1 | 0.5% |
| Yes | 21 | 40.4% | 63 | 44.1% | 84 | 43.1% |
| No | 31 | 59.6% | 79 | 55.2% | 110 | 56.4% |
| Total | 52 | 100.0% | 143 | 100.0% | 195 | 100.0% |
| Hemoptysis | No answer | 1 | 1.9% | 1 | 0.7% | 2 | 1.0% |
| Yes | 3 | 5.8% | 8 | 5.6% | 11 | 5.6% |
| No | 48 | 92.3% | 134 | 93.7% | 182 | 93.3% |
| Total | 52 | 100.0% | 143 | 100.0% | 195 | 100.0% |
| Chest pain | No answer | 0 | 0.0% | 2 | 1.4% | 2 | 1.0% |
| Yes | 22 | 42.3% | 40 | 28.0% | 62 | 31.8% |
| No | 30 | 57.7% | 101 | 70.6% | 131 | 67.2% |
| Total | 52 | 100.0% | 143 | 100.0% | 195 | 100.0% |
| Difficult breathing | No answer | 0 | 0.0% | 2 | 1.4% | 2 | 1.0% |
| Yes | 22 | 42.3% | 46 | 32.2% | 68 | 34.9% |
| No | 30 | 57.7% | 95 | 66.4% | 125 | 64.1% |
| Total | 52 | 100.0% | 143 | 100.0% | 195 | 100.0% |
| Lack of appetite | No answer | 0 | 0.0% | 1 | 0.7% | 1 | 0.5% |
| Yes | 14 | 26.9% | 27 | 18.9% | 41 | 21.0% |
| No | 38 | 73.1% | 115 | 80.4% | 153 | 78.5% |
| Total | 52 | 100.0% | 143 | 100.0% | 195 | 100.0% |
| Weight loss | No answer | 0 | 0.0% | 1 | 0.7% | 1 | 0.5% |
| Yes | 13 | 25.0% | 26 | 18.2% | 39 | 20.0% |
| No | 39 | 75.0% | 116 | 81.1% | 155 | 79.5% |
| Total | 52 | 100.0% | 143 | 100.0% | 195 | 100.0% |
| Fatigue | No answer | 0 | 0.0% | 1 | 0.7% | 1 | 0.5% |
| Yes | 26 | 50.0% | 58 | 40.6% | 84 | 43.1% |
| No | 26 | 50.0% | 84 | 58.7% | 110 | 56.4% |
| Total | 52 | 100.0% | 143 | 100.0% | 195 | 100.0% |
| Sweating | No answer | 1 | 1.9% | 2 | 1.4% | 3 | 1.5% |
| Yes | 20 | 38.5% | 38 | 26.6% | 58 | 29.7% |
| No | 31 | 59.6% | 103 | 72.0% | 134 | 68.7% |
| Total | 52 | 100.0% | 143 | 100.0% | 195 | 100.0% |

**Table S4.** Distribution of active TB cases by sex according to the number of symptoms (N=195, RR)

| Number of symptoms | Sex | | | | | |
| --- | --- | --- | --- | --- | --- | --- |
| Female | | Male | | Total | |
| TB cases | % | TB cases | % | TB cases | % of TB cases |
| No symptoms | 16 | 30.8% | 39 | 27.3% | 55 | 28.2% |
| 1 symptom | 2 | 3.8% | 20 | 14.0% | 22 | 11.3% |
| 2 symptoms | 4 | 7.7% | 20 | 14.0% | 24 | 12.3% |
| 3 or more symptoms | 30 | 57.7% | 64 | 44.8% | 94 | 48.2% |
| Total | 52 | 100.0% | 143 | 100.0% | 195 | 100.0% |

**Table S5.** Distribution of active TB cases according to the number of symptoms and addictions (n=195, RR)

| Number of symptoms | Addiction |  | TB cases | % | % of TB cases |
| --- | --- | --- | --- | --- | --- |
| No symptoms  (55 TB cases) | Smoker | Yes | 27 | 49.1% | 13.8% |
| Former | 8 | 14.5% | 4.1% |
| Alcohol | Yes | 25 | 45.5% | 12.8% |
| 1 symptom  (22 TB cases) | Smoker | Yes | 16 | 72.7% | 8.2% |
| Former | 2 | 9.1% | 1.0% |
| Alcohol | Yes | 15 | 68.2% | 7.7% |
| 2 symptoms  (24 TB cases) | Smoker | Yes | 14 | 68.2% | 7.2% |
| Former | 2 | 8.3% | 1.0% |
| Alcohol | Yes | 17 | 70.8% | 8.7% |
| 3 or more symptoms  (94 TB cases) | Smoker | Yes | 51 | 54.3% | 26.2% |
| Former | 12 | 12.8% | 6.2% |
| Alcohol | Yes | 46 | 48.9% | 23.6% |
| Total | Smoker | Yes | 108 |  | 55.4% |
| Former | 24 |  | 12.3% |
| Alcohol | Yes | 103 |  | 52.8% |

**Table S6.** Distribution of active TB cases by addiction, age and sex categories (N=195, RR)

| Addiction |  | Age category  (years) | Sex | | | | | |
| --- | --- | --- | --- | --- | --- | --- | --- | --- |
| Female | | Male | | Total | |
| TB cases | % | TB cases | % | TB cases | % |
| Smoking | Smokers | 15-19 | 1 | 5.3% | 0 | 0.0% | 1 | 0.9% |
| 20-24 | 1 | 5.3% | 0 | 0.0% | 1 | 0.9% |
| 25-34 | 2 | 10.5% | 5 | 5.6% | 7 | 6.5% |
| 35-44 | 2 | 10.5% | 14 | 15.7% | 16 | 14.8% |
| 45-54 | 8 | 42.1% | 30 | 33.7% | 38 | 35.2% |
| 55-64 | 2 | 10.5% | 27 | 30.3% | 29 | 26.9% |
| 65-74 | 2 | 10.5% | 9 | 10.1% | 11 | 10.2% |
| 75-84 | 1 | 5.3% | 4 | 4.5% | 5 | 4.6% |
| Former smokers | 20-24 | 0 | 0.0% | 1 | 5.3% | 1 | 4.2% |
| 35-44 | 2 | 40.0% | 3 | 15.8% | 5 | 20.8% |
| 45-54 | 0 | 0.0% | 4 | 21.1% | 4 | 16.7% |
| 55-64 | 1 | 20.0% | 5 | 26.3% | 6 | 25.0% |
| 65-74 | 0 | 0.0% | 4 | 21.1% | 4 | 16.7% |
| 75-84 | 1 | 20.0% | 2 | 10.5% | 3 | 12.5% |
| ≥85 | 1 | 20.0% | 0 | 0.0% | 1 | 4.2% |
| Non-smokers | 20-24 | 1 | 3.6% | 0 | 0.0% | 1 | 1.6% |
| 25-34 | 2 | 7.1% | 0 | 0.0% | 2 | 3.2% |
| 35-44 | 0 | 0.0% | 3 | 8.6% | 3 | 4.8% |
| 45-54 | 3 | 10.7% | 7 | 20.0% | 10 | 15.9% |
| 55-64 | 6 | 21.4% | 6 | 17.1% | 12 | 19.0% |
| 65-74 | 9 | 32.1% | 9 | 25.7% | 18 | 28.6% |
| 75-84 | 7 | 25.0% | 8 | 22.9% | 15 | 23.8% |
| ≥85 | 0 | 0.0% | 2 | 5.7% | 2 | 3.2% |
| Total | 15-19 | 1 | 1.9% | 0 | 0.0% | 1 | 0.5% |
| 20-24 | 2 | 3.8% | 1 | 0.7% | 3 | 1.5% |
| 25-34 | 4 | 7.7% | 5 | 3.5% | 9 | 4.6% |
| 35-44 | 4 | 7.7% | 20 | 14.0% | 24 | 12.3% |
| 45-54 | 11 | 21.2% | 41 | 28.7% | 52 | 26.7% |
| 55-64 | 9 | 17.3% | 38 | 26.6% | 47 | 24.1% |
| 65-74 | 11 | 21.2% | 22 | 15.4% | 33 | 16.9% |
| 75-84 | 9 | 17.3% | 14 | 9.8% | 23 | 11.8% |
| ≥85 | 1 | 1.9% | 2 | 1.4% | 3 | 1.5% |
| Alcohol consumption | No answer | 45-54 | 0 | 0.0% | 1 | 100.0% | 1 | 50.0% |
| 65-74 | 1 | 100.0% | 0 | 0.0% | 1 | 50.0% |
| Yes | 25-34 | 0 | 0.0% | 4 | 4.2% | 4 | 3.9% |
| 35-44 | 1 | 12.5% | 14 | 14.7% | 15 | 14.6% |
| 45-54 | 3 | 37.5% | 31 | 32.6% | 34 | 33.0% |
| 55-64 | 2 | 25.0% | 26 | 27.4% | 28 | 27.2% |
| 65-74 | 1 | 12.5% | 14 | 14.7% | 15 | 14.6% |
| 75-84 | 1 | 12.5% | 6 | 6.3% | 7 | 6.8% |
| No | 15-19 | 1 | 2.3% | 0 | 0.0% | 1 | 1.1% |
| 20-24 | 2 | 4.7% | 1 | 2.1% | 3 | 3.3% |
| 25-34 | 4 | 9.3% | 1 | 2.1% | 5 | 5.6% |
| 35-44 | 3 | 7.0% | 6 | 12.8% | 9 | 10.0% |
| 45-54 | 8 | 18.6% | 9 | 19.1% | 17 | 18.9% |
| 55-64 | 7 | 16.3% | 12 | 25.5% | 19 | 21.1% |
| 65-74 | 9 | 20.9% | 8 | 17.0% | 17 | 18.9% |
| 75-84 | 8 | 18.6% | 8 | 17.0% | 16 | 17.8% |
| ≥85 | 1 | 2.3% | 2 | 4.3% | 3 | 3.3% |
| Total | 15-19 | 1 | 1.9% | 0 | 0.0% | 1 | 0.5% |
| 20-24 | 2 | 3.8% | 1 | 0.7% | 3 | 1.5% |
| 25-34 | 4 | 7.7% | 5 | 3.5% | 9 | 4.6% |
| 35-44 | 4 | 7.7% | 20 | 14.0% | 24 | 12.3% |
| 45-54 | 11 | 21.2% | 41 | 28.7% | 52 | 26.7% |
| 55-64 | 9 | 17.3% | 38 | 26.6% | 47 | 24.1% |
| 65-74 | 11 | 21.2% | 22 | 15.4% | 33 | 16.9% |
| 75-84 | 9 | 17.3% | 14 | 9.8% | 23 | 11.8% |
| ≥85 | 1 | 1.9% | 2 | 1.4% | 3 | 1.5% |
| Drug use | No answer | 35-44 | 0 | 0.0% | 1 | 33.3% | 1 | 33.3% |
| 45-54 | 0 | 0.0% | 1 | 33.3% | 1 | 33.3% |
| 55-64 | 0 | 0.0% | 1 | 33.3% | 1 | 33.3% |
| No | 15-19 | 1 | 1.9% | 0 | 0.0% | 1 | 0.5% |
| 20-24 | 2 | 3.8% | 1 | 0.7% | 3 | 1.6% |
| 25-34 | 4 | 7.7% | 5 | 3.6% | 9 | 4.7% |
| 35-44 | 4 | 7.7% | 19 | 13.6% | 23 | 12.0% |
| 45-54 | 11 | 21.2% | 40 | 28.6% | 51 | 26.6% |
| 55-64 | 9 | 17.3% | 37 | 26.4% | 46 | 24.0% |
| 65-74 | 11 | 21.2% | 22 | 15.7% | 33 | 17.2% |
| 75-84 | 9 | 17.3% | 14 | 10.0% | 23 | 12.0% |
| ≥85 | 1 | 1.9% | 2 | 1.4% | 3 | 1.6% |
| Total | 15-19 | 1 | 1.9% | 0 | 0.0% | 1 | 0.5% |
| 20-24 | 2 | 3.8% | 1 | 0.7% | 3 | 1.5% |
| 25-34 | 4 | 7.7% | 5 | 3.5% | 9 | 4.6% |
| 35-44 | 4 | 7.7% | 20 | 14.0% | 24 | 12.3% |
| 45-54 | 11 | 21.2% | 41 | 28.7% | 52 | 26.7% |
| 55-64 | 9 | 17.3% | 38 | 26.6% | 47 | 24.1% |
| 65-74 | 11 | 21.2% | 22 | 15.4% | 33 | 16.9% |
| 75-84 | 9 | 17.3% | 14 | 9.8% | 23 | 11.8% |
| ≥85 | 1 | 1.9% | 2 | 1.4% | 3 | 1.5% |

**Table S7.** Socio-demographic characteristics of active TB cases with relapsed TB (N=45, RR)

|  | | Count | Column N % | Mean | Median |
| --- | --- | --- | --- | --- | --- |
| Age category  (years) | 20-24 | 1 | 2.2% |  |  |
| 35-44 | 6 | 13.3% |  |  |
| 45-54 | 10 | 22.2% |  |  |
| 55-64 | 19 | 42.2% |  |  |
| 65-74 | 7 | 15.6% |  |  |
| 75-84 | 1 | 2.2% |  |  |
| ≥85 | 1 | 2.2% |  |  |
| Age | |  |  | 57 | 58 |
| BMI | |  |  | 21.64 | 20.88 |
| BMI Category | No answer | 1 | 2.2% |  |  |
| 1. Underweight | 3 | 6.7% |  |  |
| 2. Normal weight | 36 | 80.0% |  |  |
| 3. Overweight | 4 | 8.9% |  |  |
| 4. Obesity grade I | 1 | 2.2% |  |  |
| Labor Market Status | Employee | 2 | 4.4% |  |  |
| Social assistance beneficiary | 6 | 13.3% |  |  |
| Inactive | 23 | 51.1% |  |  |
| Retierd | 13 | 28.9% |  |  |
| Unemployed | 1 | 2.2% |  |  |
| Smoker | Yes | 30 | 66.7% |  |  |
| Former | 5 | 11.1% |  |  |
| No | 10 | 22.2% |  |  |
| Alcohol consumption | No answer | 1 | 2.2% |  |  |
| Yes | 29 | 64.4% |  |  |
| No | 15 | 33.3% |  |  |

**Table S8.** Distribution of participants identified as TB positive in screening, by their TB history (N=195, RR)

| Characteristics TB history | | | | TB cases | % of TB cases |
| --- | --- | --- | --- | --- | --- |
| TB antecedents  (personal TB medical history) | Yes | Receive treatment for TB | Yes | 6 | 13.3% |
| No | 39 | 86.7% |
| No | Receive treatment for TB | No | 150 | 100.0% |
| Total | Receive treatment for TB | Yes | 6 | 3.1% |
| No | 189 | 96.9% |
| TB contact  (family contact with TB) | Yes | | | 25 | 12.8% |
| Nu | | | 170 | 87.2% |
| Total | | | 195 | 100.0% |
| TB contact  (acquaintances with TB) | No answer | | | 5 | 2.6% |
| Yes | | | 13 | 6.7% |
| No | | | 177 | 90.8% |
| Total | | | 195 | 100.0% |


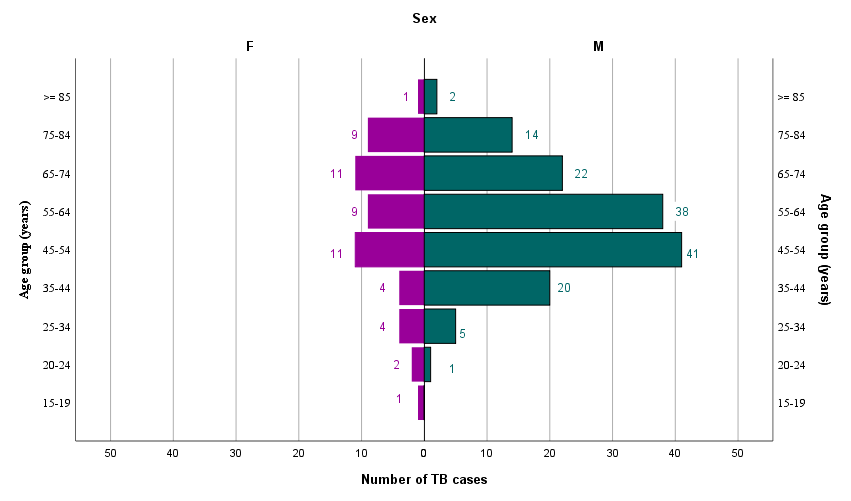


**Figure S1.** Distribution of active TB cases by age groups and sex (N=195, RR)


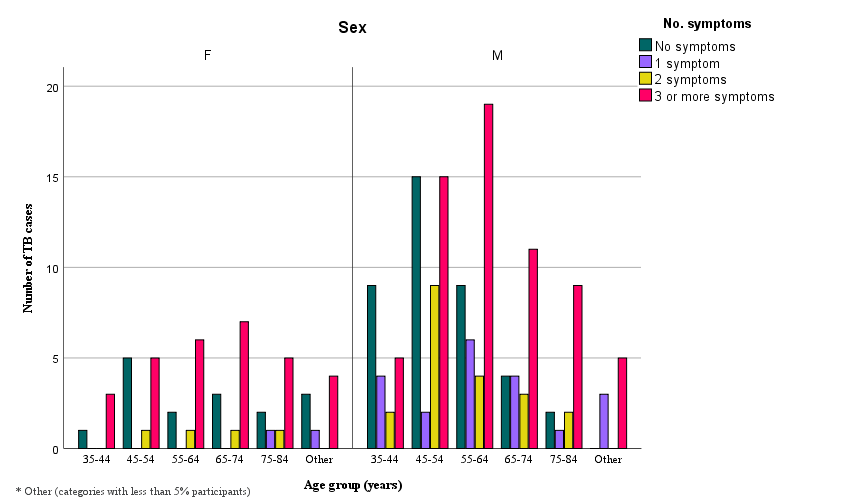


**Figure S2.** Distribution of active TB cases by sex, age and number of symptoms

**Figure S3.** Frequency of comorbidities in active TB cases in rural area (N=195)
